# Supplementary material for: Density functional study on the resistance to sulfur poisoning of Ptx (x = 0, 1, 4 and 8) modified α-Mo2C(0001) surfaces
Source: Royal Society of Chemistry journal article supplement (doi:10.1039/c7cp04718e), 2017-01-01
Supplement: c7cp04718e1.pdf [file c7cp04718e1.pdf]

## Supplementary material

### Density functional study on the resistance to sulfur poisoning of $Pt_x$ ( $x=0, 1, 4$ and $8$ ) modified $\alpha$ - $Mo_2C$ (0001) surface

Weimeng Kong, Xilin Zhang, Yanxing Zhang, Jianjun Mao, Zongxian Yang<sup>1</sup>

*College of Physics and Materials Science, Henan Normal University, Xinxiang, Henan 453007, China*

#### S.1 The possible configurations of S adsorption on the surface of $Pt_1$ - $Mo_2C$ surface

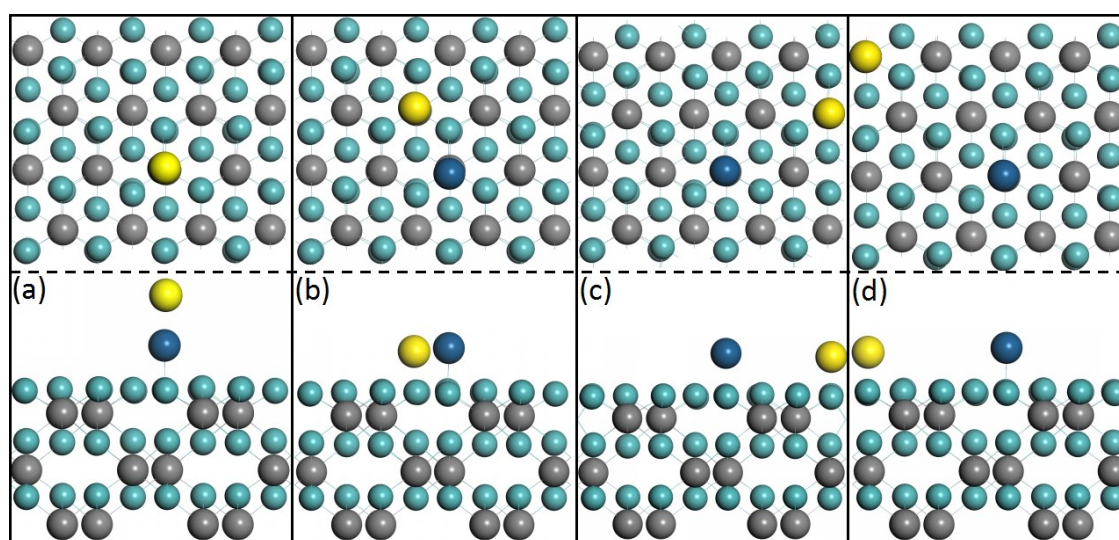

**Figure S.1** The top-views (top panel) and the corresponding side-views (bottom panel) of single S adsorbed on  $Pt_1/Mo_2C(0001)$  surface.

**Table S.1** The relative energies  $E$ (eV) and distances of the adsorbed S from the surface Pt atom  $D$ (Å) for different structures.

| Structure | a     | b     | c     | d     |
|-----------|-------|-------|-------|-------|
| $D$ (Å)   | 2.158 | 3.261 | 5.428 | 7.985 |
| $E$ (eV)  | 3.47  | 6.20  | 6.43  | 6.46  |

<sup>1</sup> Correspondence author. E-mail: [yzx@henannu.edu.cn](mailto:yzx@henannu.edu.cn) (Z. Yang)

## S.2 The Coulomb attraction of SH on the surfaces of Pt<sub>4</sub>-Mo<sub>2</sub>C and Pt<sub>1</sub>-Mo<sub>2</sub>C

According to the calculation, we can draw the conclusion that the adsorbed HS on Pt<sub>4</sub>-Mo<sub>2</sub>C is larger than that on Pt<sub>1</sub>-Mo<sub>2</sub>C. The reasons for the different adsorption energies of SH on the four surfaces were roughly investigated according to Coulomb's law. The Mulliken charges of the involved species were calculated and listed in **Table S2**. According to Coulomb's law, the force ( $F$ ) between two point charges can be described as:

$$F = \kappa \frac{Q_1 Q_2}{r_{12}^2} \quad (1)$$

where  $\kappa$ ,  $Q_1$ ,  $Q_2$  and  $r_{12}$  represents Coulomb constant, the average charge of SH (SH-chg(e)), the average charge of 3 Mo atoms in the nearest neighbor of HS (Mo-chg(e)) and the average distance between 3 Mo atoms and SH, respectively. By Coulomb's law we know that  $F$  is proportional to  $Q_1 Q_2$  and inversely proportional to  $r_{12}^2$ . Moreover, the Coulomb attraction of the substrate to the SH is mainly provided by the nearest 3 Mo atoms on both the Pt<sub>4</sub>-Mo<sub>2</sub>C and Pt<sub>1</sub>-Mo<sub>2</sub>C surfaces, where SH adsorbed at the three-fold hollow sites perpendicularly with the S moiety down. So the impacts of  $\kappa$  and  $r_{12}^2$  on  $F$  are roughly the same. Therefore, the attraction of SH on the Pt<sub>4</sub>-Mo<sub>2</sub>C surface is bigger than that on the Pt<sub>1</sub>-Mo<sub>2</sub>C surface due to the bigger product value of SH-chg(e) and Mo-chg(e) on the former.

**Table S.2** The Mulliken charges of the preferable adsorption configurations (Conf.). The negative and positive numbers represent the gain and loss of electrons, respectively. Therein SH-chg(e) stands for the average charge of SH on the different surfaces and Mo-chg(e) represents the average charge of the 3Mo atoms in the nearest neighbor of the adsorbed HS .

|                                   | $E_{\text{ads}}(\text{eV})$ | SH-chg(e) | Mo-chg(e) |
|-----------------------------------|-----------------------------|-----------|-----------|
| $\text{Mo}_2\text{C}$             | 4.15                        | -0.228    | 0.194     |
| $\text{Pt}_1\text{-Mo}_2\text{C}$ | 4.15                        | -0.227    | 0.186     |
| $\text{Pt}_4\text{-Mo}_2\text{C}$ | 4.50                        | -0.138    | 0.369     |
| $\text{Pt}_8\text{-Mo}_2\text{C}$ | 3.28                        | 0.007     | 0.355     |
